# Supplementary material for: Effects of Antibiotic Cycling Policy on Incidence of Healthcare-Associated MRSA and Clostridioides difficile Infection in Secondary Healthcare Settings
Source: PubMed Central journal article supplement (PMC6302607; doi:10.3201/eid2501.180111), 2019-01
Supplement: 18-0111-Techapp-s1.pdf [file 18-0111-Techapp-s1.pdf]

# Effects of Antimicrobial Cycling Policy on Incidence of Nosocomial MRSA and *Clostridioides difficile* Infection in Secondary Healthcare Settings

## Appendix

### ARIMA Modelling of Input and Output Variables

Time series analysis models were constructed to evaluate the relationship between the explanatory variables of antibiotic use, infection control agent use, staffing levels and Charlson age-adjusted comorbidity index and the outcome variables of HA-MRSA and HA-CDI. ARIMA models using the Box-Jenkins method for analysis were constructed to evaluate the relationships between the explanatory and outcome variables (1). Linear transfer function (LTF) models were then constructed using the method previously described by Aldeyab et al. to identify which of the explanatory variables was significantly associated with HA-MRSA and HA-CDI in Antrim Hospital, while considering any time lags before an effect is observed (2).

### References

1. Helfenstein U. Box-Jenkins modelling in medical research. *Stat Methods Med Res.* 1996;5:3–22. [PubMed http://dx.doi.org/10.1177/096228029600500102](http://dx.doi.org/10.1177/096228029600500102)
2. Aldeyab MA, Monnet DL, López-Lozano JM, Hughes CM, Scott MG, Kearney MP, et al. Modelling the impact of antibiotic use and infection control practices on the incidence of hospital-acquired methicillin-resistant *Staphylococcus aureus*: a time-series analysis. *J Antimicrob Chemother.* 2008;62:593–600. [PubMed http://dx.doi.org/10.1093/jac/dkn198](http://dx.doi.org/10.1093/jac/dkn198)

**Appendix Table 1.** Trends of explanatory variables during April 2007–March 2012\*

| Variable                                                                                     | Mean (SD)        | Coefficient | p value           |
|----------------------------------------------------------------------------------------------|------------------|-------------|-------------------|
| HA-CDI, no. cases/100 OBD                                                                    | 0.05 (0.04)      | -0.0014     | <b>&lt;0.0001</b> |
| Other CDI, no. cases/100 OBD                                                                 | 0.03(0.02)       | -0.0005     | <b>0.0012</b>     |
| HA-MRSA, no. cases/100 OBD                                                                   | 0.11 (0.04)      | -0.0006     | 0.0532            |
| Other MRSA, no. cases/100 OBD                                                                | 0.63 (0.13)      | -0.0040     | <b>&lt;0.0001</b> |
| All antibiotics, DDDs/100 OBD                                                                | 116.26 (17.96)   | 0.6825      | <b>&lt;0.0001</b> |
| β-lactamase-sensitive penicillins_J01CE, DDDs/100 OBD                                        | 2.24 (0.86)      | -0.0006     | 0.9195            |
| β-lactamase-resistant penicillins_J01CF, DDDs/100 OBD                                        | 5.73 (2.14)      | 0.06937     | <b>&lt;0.0001</b> |
| Penicillins with extended spectrum_J01CA, DDDs/100 OBD                                       | 13.81 (11.18)    | 0.5554      | <b>&lt;0.0001</b> |
| Co-amoxiclav, DDDs/100 OBD                                                                   | 32.51 (9.83)     | -0.4084     | <b>&lt;0.0001</b> |
| Piperacillin/tazobactam, DDDs/100 OBD                                                        | 7.74 (2.27)      | 0.1161      | <b>&lt;0.0001</b> |
| 1st-generation cephalosporins_J01DB, DDDs/100 OBD                                            | 0.25 (0.19)      | -0.0057     | <b>&lt;0.0001</b> |
| 2nd-generation cephalosporins_J01DC, DDDs/100 OBD                                            | 0.49 (1.14)      | -0.03540    | <b>&lt;0.0001</b> |
| 3rd-generation cephalosporins_J01DD, DDDs/100 OBD                                            | 0.46 (0.34)      | -0.0033     | 0.1954            |
| Macrolides J01FA, DDDs/100 OBD                                                               | 19.65 (4.30)     | -0.0481     | 0.1345            |
| Fluoroquinolones_J01MA, DDDs/100 OBD                                                         | 3.64 (4.07)      | -0.1212     | <b>&lt;0.0001</b> |
| Tetracyclines_J01A, DDDs/100 OBD                                                             | 5.48 (4.10)      | 0.1894      | <b>&lt;0.0001</b> |
| Alcohol-based hand rub, L/100 OBD                                                            | 1.23 (0.40)      | 0.0136      | <b>&lt;0.0001</b> |
| Alcohol-impregnated skin wipes, including alcohol and chlorhexidine wipes, no. wipes/100 OBD | 248.65 (35.25)   | 0.5040      | 0.0544            |
| Chlorhexidine scrub, L/100 OBD                                                               | 1.8 (0.3)        | -0.02       | <b>0.0001</b>     |
| Chlorhexidine powder, g/100 OBD                                                              | 0.66 (0.53)      | -0.014      | <b>0.0003</b>     |
| Gloves, no. gloves/100 OBD                                                                   | 2907.42 (473.32) | 7.2200      | <b>0.04</b>       |
| Age-adjusted co-morbidity, score/100 OBD                                                     | 2.94 (0.27)      | 0.0136      | <b>&lt;0.0001</b> |
| Pharmacist FTE, FTE/100 OBD                                                                  | 0.40 (0.05)      | 0.00213     | <b>&lt;0.0001</b> |
| Pharmacy technician FTE, FTE/100 OBD                                                         | 0.35 (0.05)      | 0.0014      | <b>0.0001</b>     |
| Nurse FTE, FTE/100 OBD                                                                       | 4.26 (0.26)      | 0.0093      | <b>&lt;0.0001</b> |
| Nursing auxiliary FTE, FTE/100 OBD                                                           | 1.19 (0.07)      | 0.0021      | <b>&lt;0.0001</b> |
| Medical staff FTE, all grades, consultant to F1 except GPWSI, FTE/100 OBD                    | 1.30 (0.22)      | 0.0100      | <b>&lt;0.0001</b> |

\*CDI, *Clostridioides difficile* infection; DDDs, defined daily doses; FTE, full-time equivalent; GPWSI, general practitioner with a special interest; HA, healthcare-associated; MRSA, methicillin-resistant *Staphylococcus aureus*; OBD, occupied bed days. Bold type indicates statistical significance.

**Appendix Table 2.** Time series analysis model for HA-CDI series (R<sup>2</sup> 0.75)\*

| Variable         | Lag time, mo.† | Coefficient (95% CI)‡    | p value          |
|------------------|----------------|--------------------------|------------------|
| Constant         | NA             | -0.007 (-0.019 to 0.005) | 0.270            |
| Fluoroquinolones | 1              | 0.005 (0.004–0.006)      | <b>&lt;0.001</b> |
| Co-amoxiclav     | 2              | 0.0004 (0.0001–0.0007)   | <b>0.016</b>     |
| CDI outbreak     | NA             | 0.032 (0.022–0.042)      | <b>&lt;0.001</b> |
| Other CDI cases  | 3              | 0.420 (0.143–0.697)      | <b>0.004</b>     |
| AR               | 1              | -0.388 (-0.656 to -0.12) | <b>0.006</b>     |
| MA               | 2              | -0.551 (-0.802 to -0.30) | <b>&lt;0.001</b> |

\*AR, autoregressive term representing past incidence density of HA-CDI; CDI, *Clostridioides difficile* infection; HA, healthcare-associated; MA, moving average term representing past disturbances in the incidence density of HA-CDI; NA, not applicable. Bold indicates statistical significance.

†Delay necessary to observe an effect.

‡Size and direction of the effect.

**Appendix Table 3.** Time series analysis model for HA-MRSA series (R<sup>2</sup> 0.48)\*

| Variable                | Lag time, mos.† | Coefficient (95% CI)‡     | p value          |
|-------------------------|-----------------|---------------------------|------------------|
| Constant                |                 | 0.116 (0.049–0.183)       | <b>0.001</b>     |
| Fluoroquinolones        | 3               | 0.004 (0.003–0.005)       | <b>&lt;0.001</b> |
| Macrolide               | 1               | 0.002 (0.001–0.003)       | <b>0.001</b>     |
| Piperacillin/tazobactam | 1               | 0.010 (0.007–0.013)       | <b>&lt;0.001</b> |
| Pharmacist FTE          | 1               | -0.373 (-0.526 to -0.22)  | <b>&lt;0.001</b> |
| MA <sup>c</sup>         | 1               | -0.671 (-0.905 to -0.437) | <b>&lt;0.001</b> |

\*FTE, full-time equivalent; HA-MRSA, healthcare-associated methicillin-resistant *Staphylococcus aureus*; MA, moving average term representing past disturbances in the incidence density of HA-MRSA. Bold indicates statistical significance.

†Delay necessary to observe an effect.

‡Size and direction of the effect.

**Appendix Table 4.** Descriptive statistics for input and output variables for the pre-intervention, intervention, and postintervention periods in Antrim and Causeway Hospitals, Northern Ireland, UK\*

| Variable                                                     | Pre-intervention, 2011 Nov–2013 Sep |                       |               | Intervention, 2013 Oct–2015 Sep |                        |                   | Postintervention, 2015 Oct–2016 Sep |                   |               |
|--------------------------------------------------------------|-------------------------------------|-----------------------|---------------|---------------------------------|------------------------|-------------------|-------------------------------------|-------------------|---------------|
|                                                              | Average use (SD)                    | Trend coefficient     | p value       | Average use (SD)                | Trend                  | p value           | Average incidence/use (SD)          | Trend coefficient | p value       |
| <b>Antrim Hospital</b>                                       |                                     |                       |               |                                 |                        |                   |                                     |                   |               |
| HA-CDI, no. cases/100 OBD                                    | 0.025 (0.018)                       | $9.34 \times 10^{-5}$ | 0.8713        | 0.023 (0.014)                   | 0.0005                 | 0.2384            | 0.019 (90.012)                      | 0.0010            | 0.3511        |
| Other CDI, no. cases/100 OBD                                 | 0.015 (0.012)                       | 0.0001                | 0.7454        | 0.018 (0.014)                   | 0.0007                 | 0.0597            | 0.021 (0.008)                       | -0.0001           | 0.8753        |
| HA-MRSA, no. cases/100 OBD                                   | 0.076 (0.035)                       | -0.0030               | <b>0.0038</b> | 0.076 (0.028)                   | 0.0012                 | 0.1588            | 0.051 (0.019)                       | -0.0004           | 0.8007        |
| Other MRSA, no. cases/100 OBD                                | 0.47 (0.077)                        | 0.0047                | 0.0514        | 0.46 (0.082)                    | 0.0008                 | 0.7355            | 0.48 (0.08)                         | -0.0099           | 0.1444        |
| New ESBL-producing organisms, no. cases/100 OBD              | 0.026 (0.014)                       | $9.68 \times 10^{-5}$ | 0.8373        | 0.049 (0.029)                   | 0.0006                 | 0.5071            | 0.083 (0.021)                       | -0.00208          | 0.2441        |
| Chlorhexidine skin wash, L/100 OBD                           | 1.29 (0.261)                        | -0.0069               | 0.4109        | 1.15 (0.117)                    | -0.0056                | 0.1038            | 1.16 (0.125)                        | -0.0034           | 0.7626        |
| Alcohol-based hand rub, L/100 OBD                            | 1.33 (0.337)                        | -0.0020               | 0.8574        | 1.31 (0.409)                    | 0.0375                 | <b>0.0006</b>     | 1.28 (0.22)                         | 0.0012            | 0.5344        |
| Piperacillin/tazobactam use, DDDs/100 OBD                    | 12.72 (1.559)                       | 0.1119                | <b>0.0184</b> | 10.14 (3.485)                   | 0.1211                 | 0.2472            | 14.26 (1.12)                        | 0.1471            | 0.1185        |
| Macrolide use, DDDs/100 OBD                                  | 17.39 (4.797)                       | -0.0613               | 0.6942        | 12.96 (9.388)                   | -0.0126                | 0.9649            | 18.49 (3.21)                        | -0.1699           | 0.5521        |
| Co-amoxiclav use, DDDs/100 OBD                               | 20.76 (3.506)                       | 0.3603                | <b>0.0002</b> | 18.49 (8.579)                   | 0.1212                 | 0.6422            | 21.65 (2.48)                        | 0.2996            | 0.1564        |
| Fluoroquinolone use, DDDs/100 OBD                            | 2.71 (0.726)                        | 0.0033                | 0.8883        | 10.39 (5.86)                    | -0.0534                | 0.7647            | 6.32 (1.64)                         | 0.1486            | 0.3001        |
| $\beta$ -lactamase-sensitive penicillins_J01CE, DDDs/100 OBD | 2.62 (0.55)                         | -0.002451             | 0.8912        | 2.2 (1.22)                      | -0.117074              | <b>0.0003</b>     | 0.96 (0.32)                         | -0.029760         | 0.2914        |
| $\beta$ -lactamase-resistant penicillins_J01CF, DDDs/100 OBD | 8.26 (1.66)                         | -0.066818             | 0.2073        | 11.52 (2.18)                    | 0.017952               | 0.7865            | 7.22 (1.79)                         | -0.272214         | 0.0647        |
| Penicillins with extended-spectrum_J01CA, DDDs/100 OBD       | 34.75 (6.49)                        | 0.470198              | <b>0.0172</b> | 53.86 (8.79)                    | 0.223252               | 0.4011            | 38.75(3.98)                         | -0.535384         | 0.1106        |
| <b>OBD</b>                                                   |                                     |                       |               |                                 |                        |                   |                                     |                   |               |
| Monobactams, DDDs/100 OBD                                    | 1.36 (0.44)                         | 0.023281              | 0.0957        | 6.48 (2.40)                     | -0.055678              | 0.4431            | 1.52 (1.55)                         | -0.238161         | <b>0.0049</b> |
| Carbapenems, DDDs/100 OBD                                    | 4.00 (0.89)                         | -0.001640             | 0.9550        | 3.12 (1.02)                     | -0.112413              | <b>&lt;0.0001</b> | 2.16 (0.48)                         | -0.024279         | 0.5687        |
| 1st-generation cephalosporins_J01DB, DDDs/100 OBD            | 0.43 (0.21)                         | 0.021690              | <b>0.0002</b> | 0.84 (0.28)                     | -0.007065              | 0.3972            | 0.58 (0.10)                         | 0.002397          | 0.7928        |
| 2nd-generation cephalosporins_J01DC, DDDs/100 OBD            | 0.05 (0.06)                         | 0.000988              | 0.6156        | 0.37 (0.22)                     | 0.011200               | 0.0831            | 0.27 (0.06)                         | 0.000150          | 0.9790        |
| 3rd-generation cephalosporins_J01DD, DDDs/100 OBD            | 0.39 (0.18)                         | 0.004219              | 0.4572        | 0.57 (0.36)                     | 0.020622               | <b>0.0474</b>     | 0.62 (0.39)                         | 0.029161          | 0.4023        |
| Tetracyclines_J01A, DDDs/100 OBD                             | 11.6 (2.63)                         | 0.129842              | 0.1187        | 21.76 (7.86)                    | 0.124861               | 0.6014            | 11.79 (1.96)                        | 0.006404          | 0.9711        |
| Glycopeptides, DDDs/100 OBD                                  | 8.57 (1.61)                         | 0.001779              | 0.9730        | 12.8 (3.23)                     | -0.018187              | 0.8534            | 8.85 (0.99)                         | 0.003556          | 0.9682        |
| Total antibiotic use, DDD/100 OBD                            | 146.2 (13.26)                       | 0.780613              | 0.0591        | 192.00 (16.96)                  | 0.114352               | 0.8249            | 148.14 (8.77)                       | -0.345771         | 0.6594        |
| <b>Causeway Hospital</b>                                     |                                     |                       |               |                                 |                        |                   |                                     |                   |               |
| HA-CDI, no. cases/100 OBD                                    | 0.030 (0.031)                       | -0.0009               | 0.3858        | 0.017 (0.014)                   | $-5.14 \times 10^{-4}$ | 0.2101            | NR                                  | NR                | NR            |
| Other CDI, no. cases/100 OBD                                 | 0.012 (0.012)                       | -0.0005               | 0.2350        | 0.016 (0.019)                   | $9.65 \times 10^{-5}$  | 0.8705            | NR                                  | NR                | NR            |
| HA-MRSA, no. cases/100 OBD                                   | 0.076 (0.031)                       | -0.0008               | 0.4534        | 0.074 (0.035)                   | -0.0013                | 0.2150            | NR                                  | NR                | NR            |
| Other MRSA, no. cases/100 OBD                                | 0.513 (0.119)                       | -0.0068               | 0.0654        | 0.522 (0.102)                   | 0.0059                 | <b>0.0460</b>     | NR                                  | NR                | NR            |
| MRSA, no. screens/100 OBD                                    | 2.20 (0.16)                         | -0.0008               | 0.8703        | 2.56 (0.24)                     | 0.0111                 | 0.1231            | NR                                  | NR                | NR            |
| New ESBL-producing organisms, no. cases/100 OBD              | 0.036 (0.033)                       | 0.0004                | 0.6741        | 0.038 (0.030)                   | 0.0015                 | 0.0793            | NR                                  | NR                | NR            |
| Chlorhexidine skin wash, L/100 OBD                           | 1.95 (0.33)                         | -0.0249               | <b>0.0360</b> | 1.85 (0.22)                     | $9.78 \times 10^{-4}$  | 0.8827            | NR                                  | NR                | NR            |
| Alcohol-based hand rub, L/100 OBD                            | NR                                  | NR                    | NR*           | 1.10 (0.50)                     | -0.0056                | 0.7131            | NR                                  | NR                | NR            |
| Piperacillin/tazobactam use, DDDs/100 OBD                    | 13.07 (1.37)                        | 0.0370                | 0.4030        | 12.998 (2.068)                  | 0.086                  | 0.1630            | NR                                  | NR                | NR            |
| Macrolide use, DDDs/100 OBD                                  | 17.94 (4.32)                        | -0.1713               | 0.2154        | 17.389 (3.941)                  | 0.0756                 | 0.5272            | NR                                  | NR                | NR            |
| Co-amoxiclav use, DDDs/100 OBD                               | 19.33 (5.08)                        | 0.3848                | <b>0.0122</b> | 23.551 (3.129)                  | 0.0056                 | 0.9532            | NR                                  | NR                | NR            |
| Fluoroquinolone use, DDDs/100 OBD                            | 3.89 (1.76)                         | -0.0629               | 0.2644        | 5.868 (2.371)                   | 0.1916                 | <b>0.0035</b>     | NR                                  | NR                | NR            |
| $\beta$ -lactamase-sensitive penicillins_J01CE, DDDs/100 OBD | 1.92 (0.93)                         | -0.002451             | 0.8912        | 1.92 (1.56)                     | -0.107652              | <b>0.0158</b>     | NR                                  | NR                | NR            |
| $\beta$ -lactamase-resistant penicillins_J01CF, DDDs/100 OBD | 6.82 (3.39)                         | -0.002451             | 0.8912        | 7.97 (1.98)                     | 0.068039               | 0.2517            | NR                                  | NR                | NR            |

| Variable                                               | Pre-intervention, 2011 Nov–2013 Sep |                   |         | Intervention, 2013 Oct–2015 Sep |           |               | Postintervention, 2015 Oct–2016 Sep |                   |         |
|--------------------------------------------------------|-------------------------------------|-------------------|---------|---------------------------------|-----------|---------------|-------------------------------------|-------------------|---------|
|                                                        | Average use (SD)                    | Trend coefficient | p value | Average use (SD)                | Trend     | p value       | Average incidence/use (SD)          | Trend coefficient | p value |
| Penicillins with extended-spectrum_J01CA, DDDs/100 OBD | 30.57 (5.71)                        | -0.113964         | 0.7151  | 35.71 (8.42)                    | 0.708057  | <b>0.0022</b> | NR                                  | NR                | NR      |
| Monobactams, DDDs/100 OBD                              | 0.91 (0.49)                         | 0.028603          | 0.2951  | 1.86 (0.99)                     | 0.033870  | 0.2530        | NR                                  | NR                | NR      |
| Carbapenems, DDDs/100 OBD                              | 3.9 (1.39)                          | 0.000882          | 0.9911  | 3.62 (1.44)                     | -0.106339 | <b>0.0091</b> | NR                                  | NR                | NR      |
| 1st-generation cephalosporins_J01DB, DDDs/100 OBD      | 0.42 (0.32)                         | 0.011632          | 0.5211  | 0.52 (0.24)                     | -0.014970 | <b>0.0282</b> | NR                                  | NR                | NR      |
| 2nd-generation cephalosporins_J01DC, DDDs/100 OBD      | 0.22 (0.22)                         | -0.020279         | 0.0979  | 0.30 (0.17)                     | 0.007696  | 0.1205        | NR                                  | NR                | NR      |
| 3rd-generation cephalosporins_J01DD, DDDs/100 OBD      | 0.55 (0.31)                         | 0.003441          | 0.8461  | 0.65 (0.46)                     | 0.008809  | 0.5270        | NR                                  | NR                | NR      |
| Tetracyclines_J01A, DDDs/100 OBD                       | 9.46 (2.5)                          | 0.163824          | 0.2396  | 12.56 (4.7)                     | 0.359609  | <b>0.0063</b> | NR                                  | NR                | NR      |
| Glycopeptides, DDDs/100 OBD                            | 7.68 (2.23)                         | 0.021618          | 0.8651  | 7.98 (1.84)                     | 0.135931  | <b>0.0089</b> | NR                                  | NR                | NR      |
| Total antibiotic use, DDD/100 OBD                      | 135.62 (19.24)                      | 0.381676          | 0.7279  | 152.49 (19.45)                  | 1.527800  | <b>0.0048</b> | NR                                  | NR                | NR      |

\*CDI, *Clostridioides difficile* infection; DDDs, defined daily doses; HA, healthcare-associated; MRSA, methicillin-resistant *Staphylococcus aureus*; NR, data not recorded; OBD, occupied bed days. Bold type indicates statistical significance.

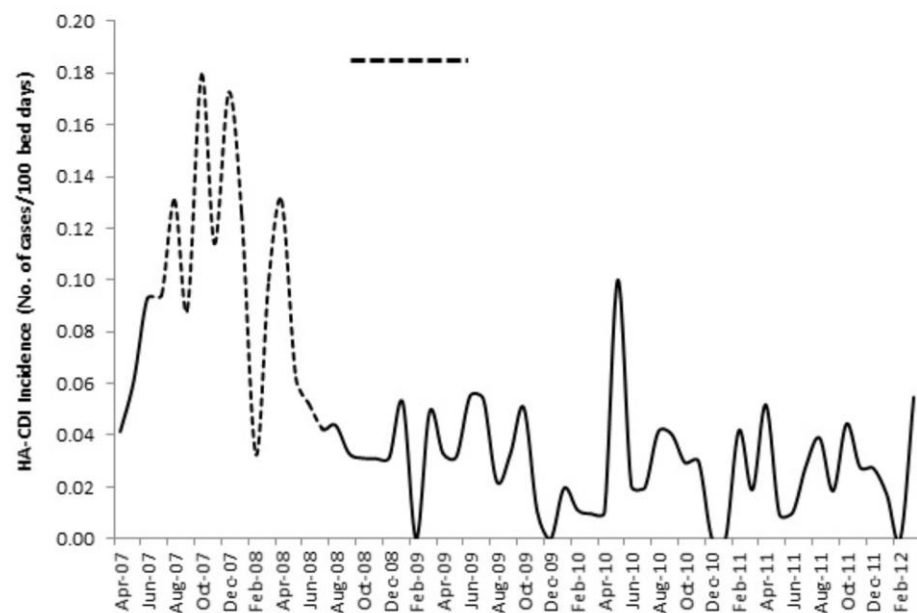

**Appendix Figure 1.** Incidence of healthcare-associated *Clostridioides difficile* infection in Antrim Area Hospital, Northern Ireland, UK, April 2007–March 2012.

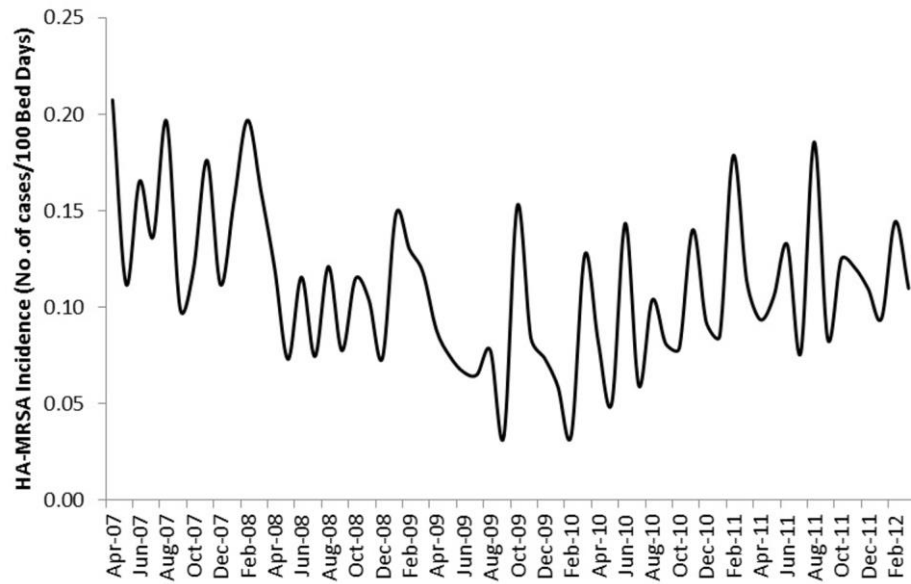

**Appendix Figure 2.** Total incidence of healthcare-associated methicillin-resistant *Staphylococcus aureus* in Antrim Area Hospital, Northern Ireland, UK, April 2007–March 2012.

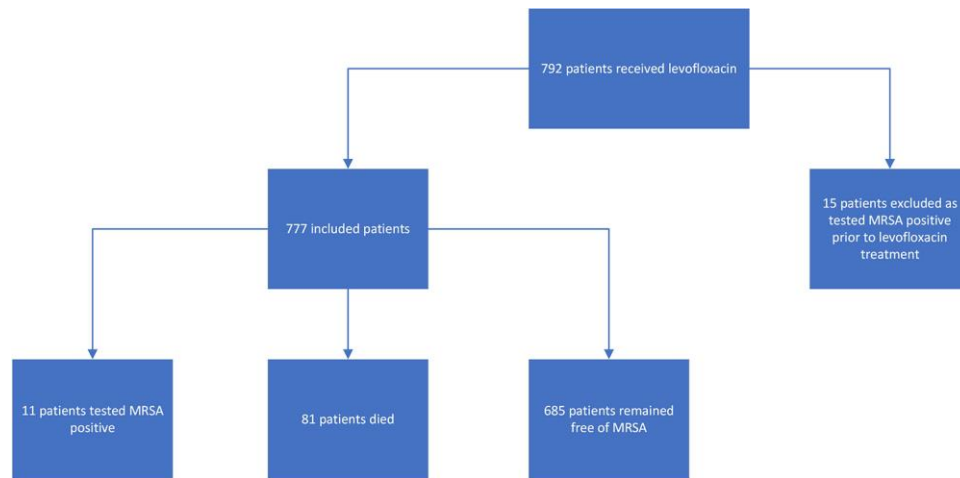

**Appendix Figure 3.** Methicillin-resistant *Staphylococcus aureus* acquisition in patients who received levofloxacin.

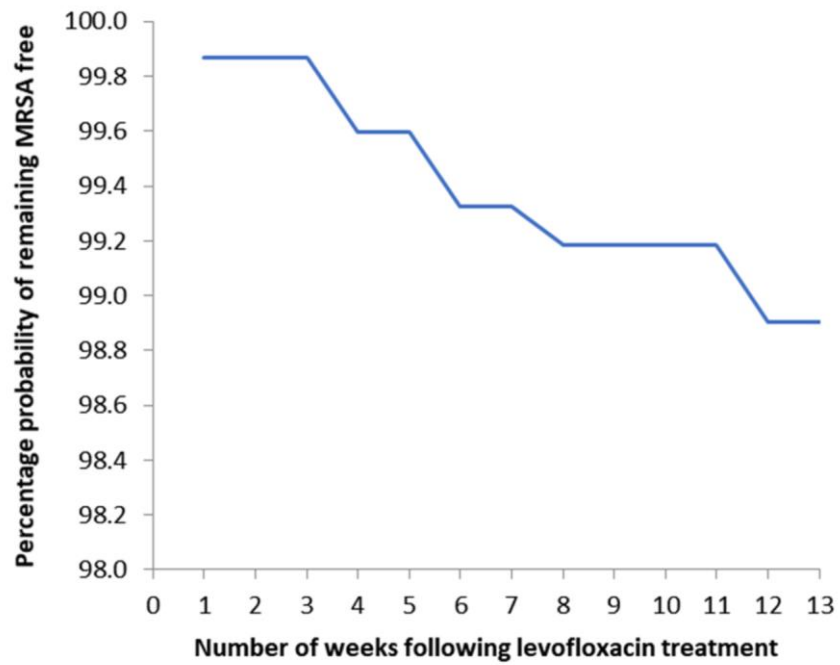

**Appendix Figure 4.** Percentage probability of remaining free of methicillin-resistant *Staphylococcus aureus* 12 weeks after levofloxacin treatment.

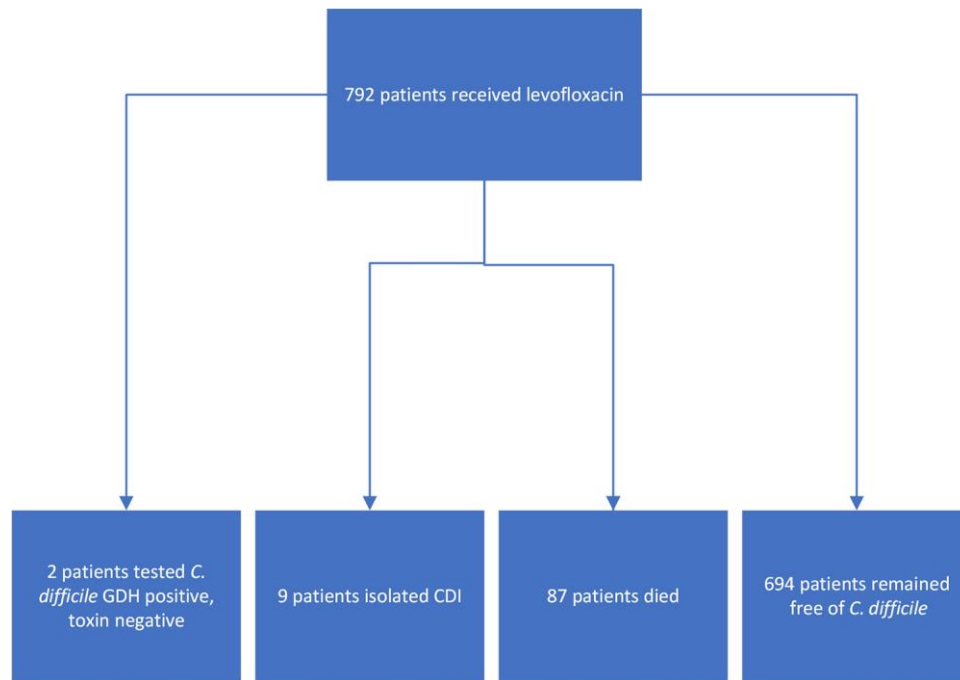

**Appendix Figure 5.** *Clostridioides difficile* infection acquisition in patients who received levofloxacin.



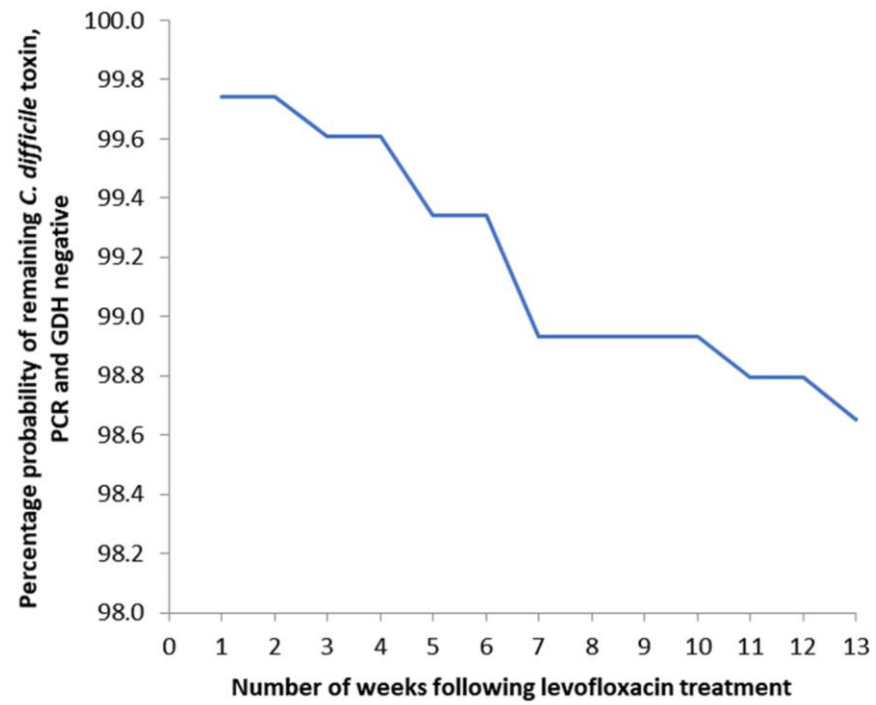

**Appendix Figure 6.** Percentage probability of remaining free of colonization or infection with *Clostridioides difficile* after levofloxacin treatment.
